# Supplementary material for: Wogonoside inhibits TNF receptor-associated factor 6 (TRAF6) mediated-tumor microenvironment and prognosis of pancreatic cancer
Source: PubMed Central journal article supplement — Ann Transl Med. 2021 Sep;9(18):1460. doi: 10.21037/atm-21-4164 (PMC8506702; doi:10.21037/atm-21-4164), 2021-09
Supplement: atm-09-18-1460-supplementary.pdf [file atm-09-18-1460-supplementary.pdf]

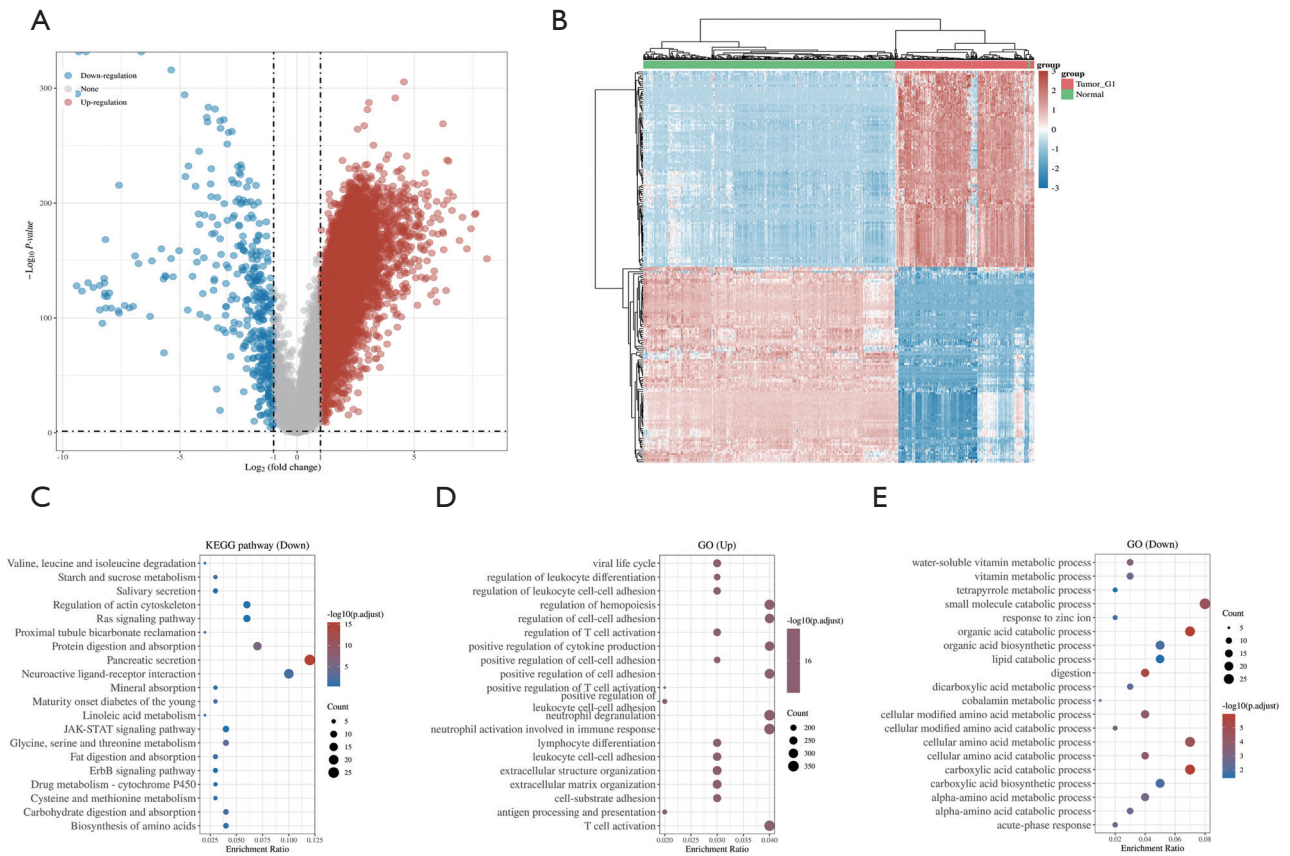

**Figure S1** The differential expression of mRNAs between PC samples and normal tissues was analyzed. (A) Volcano plots were constructed using fold-change values and adjusted P. The red point in the plot is the over-expressed mRNAs, and the blue point shows the down-expressed mRNAs with statistical significance. (B) Hierarchical clustering analysis of mRNAs, which were differentially expressed between tumor and normal tissues. (C-E) The results of differentially expressed genes of KEGG-DOWN, GO-UP, and GO-DOWN.
